# Supplementary material for: PRMT5 reduces immunotherapy efficacy in triple-negative breast cancer by methylating KEAP1 and inhibiting ferroptosis
Source: PubMed Central journal article supplement — J Immunother Cancer. 2023 Jun 28;11(6):e006890. doi: 10.1136/jitc-2023-006890 (PMC10410861; doi:10.1136/jitc-2023-006890), 2023-06-28
Supplement: jitc-2023-006890supp001.pdf [file jitc-2023-006890supp001.pdf]

## Supplemental Information

**PRMT5 promotes resistance to immunotherapy in triple negative breast cancer by methylating KEAP1 and inhibiting ferroptosis**

**Wang Z et.al**

**Supplementary Table S1**

| <b>Oligonucleotides</b>                           |
|---------------------------------------------------|
| siRNA: scrambled control RNA                      |
| siRNA: PRMT5#1: GGACCTGAGAGATGATATA               |
| siRNA: PRMT5#2: CCAGAAGAGGAGAAGGATA               |
| siRNA: TRIM25#1: AACAAAGAATACACGGAAATGAAG         |
| siRNA: TRIM25#2: CAGCAAGTTTGACACCATTATC           |
| Primer: PRMT5 (F):5'-CCTGTGGAGGTGAACACAGT-3'      |
| Primer: PRMT5 (R):5'-AGAGGATGGGAAACCATGAG-3'      |
| Primer: KEAP1 (F):5'- CTGGAGGATCATACCAAGCAGG-3'   |
| Primer: KEAP1 (R):5'- GGATACCCTCAATGGACACCAC -3'  |
| Primer: NRF2 (F):5'- TCAGCGACGGAAAGAGTATGA-3'     |
| Primer: NRF2 (R):5'- CCACTGGTTTCTGACTGGATGT-3'    |
| Primer: HMOX1 (F):5'- AAGACTGCGTTCCTGCTCAAC-3'    |
| Primer: HMOX1 (R):5'- AAAGCCCTACAGCAACTGTCTG-3'   |
| Primer: SLC7A11 (F):5'- TCTCAAAGGAGGTTACCTGC-3'   |
| Primer: SLC7A11 (R):5'- AGACTCCCCTCAGTAAAGTGAC-3' |
| Primer: GPX4 (F):5'- GAGGCAAGACCGAAGTAACTAC-3'    |
| Primer: GPX4 (R):5'- CCGAACTGGTTACACGGGAA-3'      |
| Primer: GAPDH(F):5'- GAAAGCCTGCCGGTACTAA-3'       |
| Primer: GAPDH(R):5'- GCCCAATACGACCAAATCAGAGA-3'   |

**Supplementary Table S2****PRmePred**

| Position | Peptide             | Score    |
|----------|---------------------|----------|
| 6        | MQPDRPSGAGACCR      | 0.903601 |
| 15       | RPSGAGACCRFLPLQSQCP | 0.82419  |
| 362      | LRLADLQVPRSLAGCVVG  | 0.832482 |
| 415      | CAPMSVPRNRIGVGVIDGH | 0.903907 |
| 596      | DTDTWSEVTRMTSGRSGVG | 0.835933 |
| 601      | SEVTRMTSGRSGVGVAVTM | 0.955328 |

**GPS-MSP**

| Position | Peptide             | Score |
|----------|---------------------|-------|
| 71       | AFGIMNELRLSQQLCDV   | 3.50  |
| 116      | KAMFTNGLREQGMEVVS   | 3.63  |
| 234      | CQLVTLISRDDLNRCE    | 3.71  |
| 596      | DTDTWSEVTRMTSGRSGVG | 4.17  |

**Supplementary Table S3**

**The PRMT5 and KEAP1 protein expression levels are positively correlated in human breast cancer specimens.**

|       |          | PRMT5    |          |       |
|-------|----------|----------|----------|-------|
|       |          | Positive | Negative | Total |
| KEAP1 | Positive | 23       | 7        | 30    |
|       | Negative | 5        | 11       | 16    |
|       | Total    | 28       | 18       | 46    |

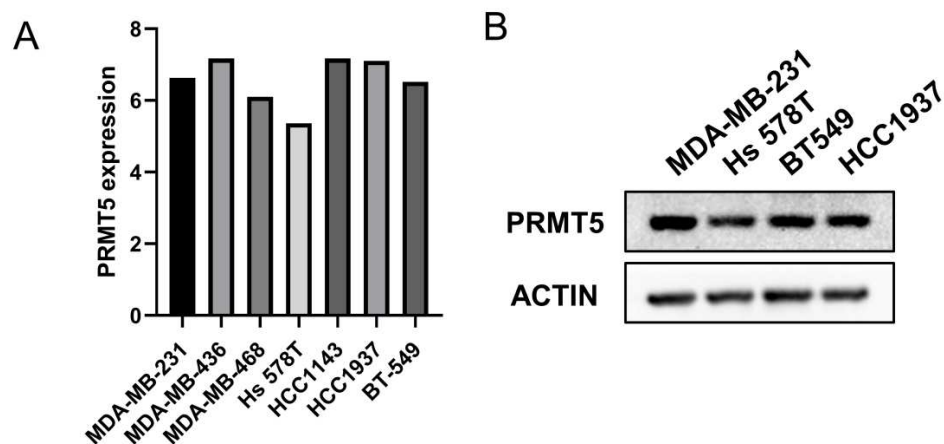

**Supplementary Fig. S1** The levels of PRMT5 mRNA and protein expression were comparable among triple negative breast cancer cell lines **A**. The mRNA levels of triple negative breast cancer cell lines gained from Cancer Cell Line Encyclopedia ([Cancer Cell Line Encyclopedia \(CCLE\) \(broadinstitute.org\)](https://cancer.celllineencyclopedia.org/)) dataset. **B**. The PRMT5 protein expression of four triple negative breast cancer cells were detected by immunoblotting.

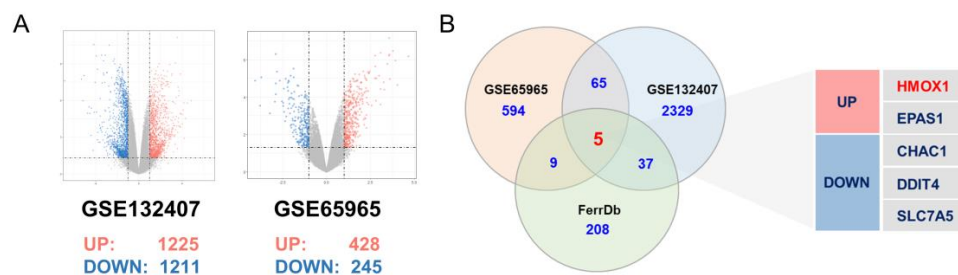

**Supplementary Fig. S2** The ferroptosis associated genes regulated by PRMT5. **A**. Volcano plot of differentially expressed genes reveals putative genes regulated by PRMT5. **B**. Venn diagram of differentially expressed genes and ferroptosis associated genes highlights 5 candidates for ferroptosis associated genes regulated by PRMT5.

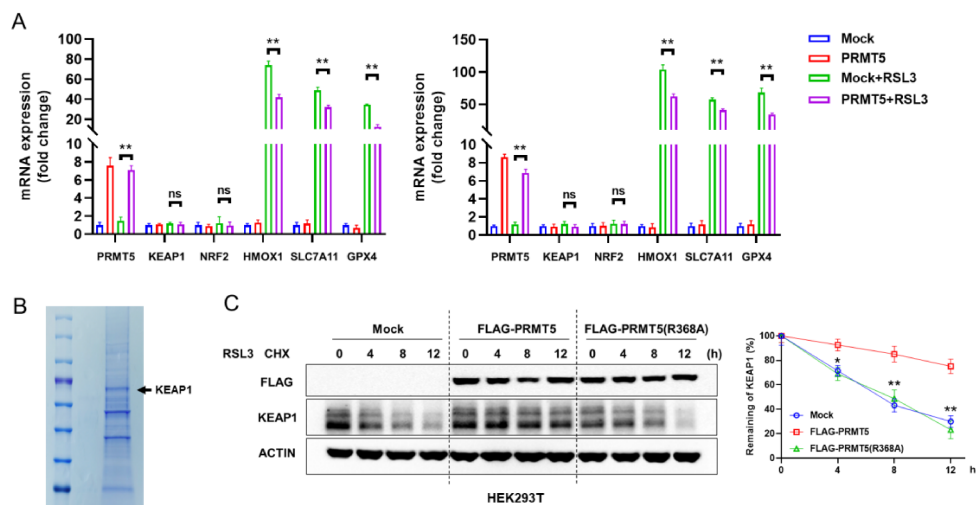

**Supplementary Fig. S3 PRMT5 overexpression had no effect on the mRNA expression of KEAP1 and NRF2 but significantly extended the half-life of KEAP1 with pre-treated RSL3.** **A.** PRMT5 overexpression had no effect on KEAP1 and NRF2 mRNA levels in MDA-MB-231 and HCC1937 cells in the presence of RSL3 but significantly decreased the mRNA levels of HMOX1, SLC7A11 and GPX4. **B.** Liquid chromatography-tandem mass spectrometry identified potential substrates of PRMT5. **C.** PRMT5 overexpression extended the half-life of KEAP1 with pre-treated RSL3. HEK293T cells were transfected with Flag-PRMT5 or Flag-PRMT5-R368A for 48h and then treated with RSL3 (3 $\mu$ M) for 6h, following CHX for the indicated times. The graph shows the quantitative results from the left panel. Average of three experiments. \* $P < 0.05$ . \*\*  $P < 0.01$ .

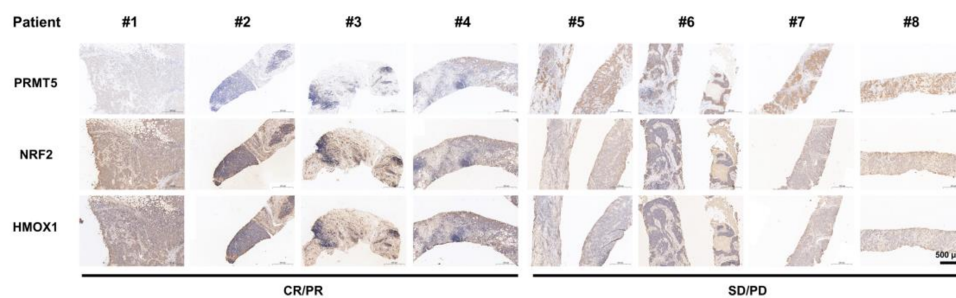

**Supplementary Fig. S4 Expression of PRMT5, NRF2 and HMOX1 protein in human specimen derived from eight TNBC patients that received immunotherapy.**

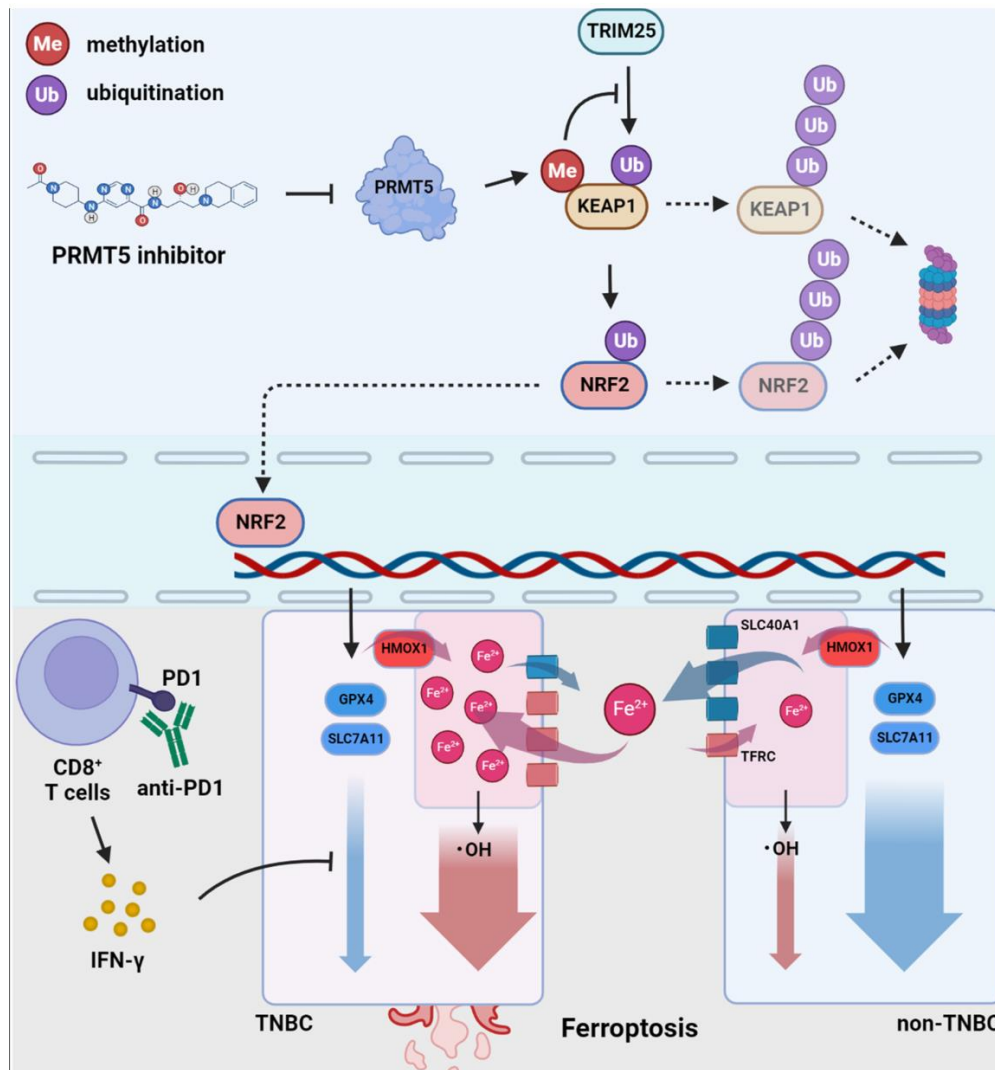

**Supplementary Fig. S5 Schematic of the proposed model showing that PRMT5 inhibits triple negative breast cancer ferroptosis by suppressing NRF2/HMOX1 pathway and PRMT5-targeted drugs combined with immunotherapy may be a potential treatment strategy for triple negative breast cancer.**
